# Supplementary material for: Assessing the Effects of Ozonation on the Concentrations of Personal Care Products and Acute Toxicity in Sludges of Wastewater Treatment Plants
Source: MDPI journal article supplement (doi:10.3390/toxics11010075), 2023-01-13
Supplement: s1 [file s1]

# Supplementary Materials

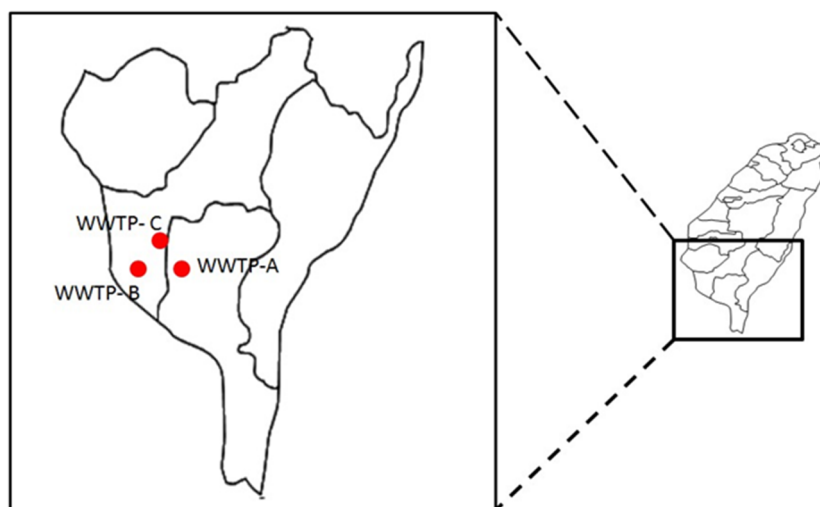

**Figure S1.** Location map of the study area in Taiwan.

**Table S1.** Instrument parameter conditions of the target compound

| Compound | Retention time (min) | UV (nm) | Excitation | Emission |
|----------|----------------------|---------|------------|----------|
| NP       | 9.2                  | -       | 227        | 313      |
| TCS      | 7.8                  | 220     | -          | -        |
| BP-3     | 5.4                  | 220     | -          | -        |
| CAF      | 6.8                  | 273     | -          | -        |

**Table S2.** Validation parameters of the method for quantitative analysis of target compound

| Compound | Linearity              |                             | Recovery (%)   | MDL (ng/L) | LOQ (ng/L) |
|----------|------------------------|-----------------------------|----------------|------------|------------|
|          | Equation               | Correlation Coefficient (R) |                |            |            |
| NP       | $y = 40.486x - 1620.4$ | 0.9998                      | $110 \pm 6.09$ | 15         | 45         |
| TCS      | $y = 69.115x + 1535.7$ | 0.9999                      | $92 \pm 1.85$  | 15         | 45         |
| BP-3     | $y = 62.558x + 1062.9$ | 0.9999                      | $80 \pm 2.59$  | 20         | 60         |

|     |                      |        |                |    |    |
|-----|----------------------|--------|----------------|----|----|
| CAF | $y = 26.564x - 7271$ | 0.9951 | $110 \pm 6.94$ | 25 | 75 |
|-----|----------------------|--------|----------------|----|----|
